# Supplementary material for: Carbon dioxide and water co-adsorption on the low-index surfaces of TiC, VC, ZrC and NbC: a DFT study
Source: Royal Society of Chemistry journal article supplement (doi:10.1039/c9cp00924h), 2019-01-01
Supplement: c9cp00924h1.pdf [file c9cp00924h1.pdf]

## Supporting Information

### Carbon dioxide and water adsorption on the low-index surfaces of TiC, VC, ZrC and NbC: A DFT study

Matthew G. Quesne<sup>†</sup>, Alberto Roldan<sup>†</sup>, Nora H. de Leeuw<sup>†</sup> and C. Richard A. Catlow<sup>†</sup>

<sup>†</sup>School of Chemistry, Cardiff University, Main Building, Park Place, Cardiff CF10 3AT, UK.

**Table S1. Geometry scans for CO<sub>2</sub> on four low-index surfaces of NbC. The distance between the surfaces and adsorbate (Cslab) are given in Å; whilst the energies of the total (E<sub>TOT</sub>) and relative values are given in eV.**

| NbC{001}  |                  |                 |                 | NbC{011}  |                  |                 |                 |
|-----------|------------------|-----------------|-----------------|-----------|------------------|-----------------|-----------------|
| Cslab     | E <sub>TOT</sub> | ΔE <sup>a</sup> | ΔE <sup>b</sup> | Cslab     | E <sub>TOT</sub> | ΔE <sup>a</sup> | ΔE <sup>b</sup> |
| 3.13      | -1018.49         | -0.20           | 0.00            | 2.31      | -985.89          | -0.29           | 0.00            |
| 2.90      | -1018.49         | -0.21           | -0.01           | 2.13      | -985.89          | -0.28           | 0.01            |
| 2.66      | -1018.43         | -0.14           | 0.06            | 1.96      | -985.82          | -0.22           | 0.07            |
| 2.43      | -1018.32         | -0.04           | 0.17            | 1.78      | -985.73          | -0.13           | 0.16            |
| 2.19      | -1018.25         | 0.03            | 0.23            | 1.61      | -985.76          | -0.16           | 0.13            |
| 1.96      | -1018.49         | -0.21           | 0.00            | 1.44      | -985.83          | -0.23           | 0.06            |
| NbC{111}C |                  |                 |                 | NbC{111}M |                  |                 |                 |
| Cslab     | E <sub>TOT</sub> | ΔE <sup>a</sup> | ΔE <sup>b</sup> | Cslab     | E <sub>TOT</sub> | ΔE <sup>a</sup> | ΔE <sup>b</sup> |
| 2.95      | -956.01          | -0.21           | 0.00            | 1.55      | -954.47          | -1.98           | 0.00            |
| 2.81      | -955.99          | -0.20           | 0.02            | 1.72      | -954.21          | -1.73           | 0.25            |
| 2.64      | -955.95          | -0.16           | 0.05            | 2.08      | -952.97          | -0.49           | 1.49            |
| 2.46      | -955.87          | -0.08           | 0.14            |           |                  |                 |                 |
| 2.28      | -955.73          | 0.07            | 0.28            |           |                  |                 |                 |
| 2.10      | -955.53          | 0.26            | 0.48            |           |                  |                 |                 |
| 1.93      | -955.23          | 0.56            | 0.78            |           |                  |                 |                 |
| 1.75      | -955.56          | 0.23            | 0.45            |           |                  |                 |                 |
| 1.57      | -956.09          | -0.30           | -0.09           |           |                  |                 |                 |

<sup>a</sup>Energy relative to separate slab and CO<sub>2</sub>. <sup>b</sup>Energies relative to physically adsorbed state

**Table S2. Geometry scans for CO<sub>2</sub> on four low-index surfaces of ZrC. The distance between the surfaces and adsorbate (Cslab) are given in Å; whilst the energies of the total (E<sub>TOT</sub>) and relative values are given in eV.**

| ZrC{001}  |                  |                 |                 | ZrC{011}  |                  |                 |                 |
|-----------|------------------|-----------------|-----------------|-----------|------------------|-----------------|-----------------|
| Cslab     | E <sub>TOT</sub> | ΔE <sup>a</sup> | ΔE <sup>b</sup> | Cslab     | E <sub>TOT</sub> | ΔE <sup>a</sup> | ΔE <sup>b</sup> |
| 2.92      | -959.73          | -0.27           | 0.00            | 2.56      | -922.35          | -0.23           | 0.00            |
| 2.68      | -959.70          | -0.24           | 0.03            | 2.36      | -922.34          | -0.22           | 0.00            |
| 2.44      | -959.66          | -0.20           | 0.07            | 2.16      | -922.34          | -0.22           | 0.01            |
| 2.20      | -959.62          | -0.16           | 0.11            | 1.96      | -922.35          | -0.23           | 0.00            |
| 1.95      | -959.71          | -0.25           | 0.02            | 1.76      | -922.39          | -0.27           | -0.04           |
| 1.71      | -960.15          | -0.69           | -0.43           | 1.56      | -922.46          | -0.34           | -0.12           |
|           |                  |                 |                 | 1.36      | -922.77          | -0.65           | -0.42           |
| ZrC{111}C |                  |                 |                 | ZrC{111}M |                  |                 |                 |
| Cslab     | E <sub>TOT</sub> | ΔE <sup>a</sup> | ΔE <sup>b</sup> | Cslab     | E <sub>TOT</sub> | ΔE <sup>a</sup> | ΔE <sup>b</sup> |
| 3.07      | -879.22          | -0.25           | 0.00            | 1.40      | -883.32          | -3.32           | 0.00            |
| 2.67      | -879.13          | -0.16           | 0.09            | 1.58      | -883.17          | -3.16           | 0.16            |
| 2.49      | -879.04          | -0.08           | 0.17            | 1.94      | -882.07          | -2.06           | 1.25            |
| 2.31      | -879.06          | -0.09           | 0.16            | 2.12      | -882.12          | -2.12           | 1.20            |
| 2.12      | -878.95          | 0.01            | 0.27            |           |                  |                 |                 |
| 1.94      | -894.31          | -15.34          | -15.09          |           |                  |                 |                 |
| 1.76      | -894.33          | -15.37          | -15.12          |           |                  |                 |                 |
| 1.58      | -894.32          | -15.36          | -15.11          |           |                  |                 |                 |
| 1.39      | -894.33          | -15.36          | -15.11          |           |                  |                 |                 |

<sup>a</sup>Energy relative to separate slab and CO<sub>2</sub>. <sup>b</sup>Energies relative to physically adsorbed state

**Table S3. Geometry scans for CO<sub>2</sub> on four low-index surfaces of TiC. The distance between the surfaces and adsorbate (Cslab) are given in Å; whilst the energies of the total (E<sub>TOT</sub>) and relative values are given in eV.**

| TiC{001} |                  |                 |                 | TiC{011} |                  |                 |                 |
|----------|------------------|-----------------|-----------------|----------|------------------|-----------------|-----------------|
| Cslab    | E <sub>TOT</sub> | ΔE <sup>a</sup> | ΔE <sup>b</sup> | Cslab    | E <sub>TOT</sub> | ΔE <sup>a</sup> | ΔE <sup>b</sup> |
| 3.13     | -931.20          | -0.26           | 0.00            | 0.93     | -897.91          | -3.45           | 0.00            |
| 2.90     | -931.16          | -0.23           | 0.03            | 1.13     | -897.79          | -3.33           | 0.12            |
| 2.67     | -931.14          | -0.21           | 0.05            | 1.32     | -897.52          | -3.06           | 0.39            |
| 2.44     | -931.08          | -0.14           | 0.11            | 1.51     | -897.19          | -2.73           | 0.72            |
| 2.21     | -930.98          | -0.04           | 0.22            | 1.70     | -896.80          | -2.34           | 1.11            |
| 1.98     | -930.91          | 0.03            | 0.29            | 1.90     | -896.19          | -1.73           | 1.72            |
| 1.74     | -931.06          | -0.13           | 0.13            | 2.09     | -895.57          | -1.11           | 2.34            |
|          |                  |                 |                 | 2.28     | -894.95          | -0.49           | 2.96            |
|          |                  |                 |                 | 2.48     | -894.64          | -0.18           | 3.27            |
|          |                  |                 |                 | 2.67     | -894.54          | -0.08           | 3.37            |
|          |                  |                 |                 | 2.86     | -894.63          | -0.17           | 3.28            |
|          |                  |                 |                 | 3.05     | -894.78          | -0.32           | 3.14            |
|          |                  |                 |                 | 3.25     | -894.83          | -0.37           | 3.08            |
|          |                  |                 |                 | 3.44     | -894.78          | -0.32           | 3.13            |
|          |                  |                 |                 | 3.63     | -894.70          | -0.24           | 3.22            |
|          |                  |                 |                 | 3.82     | -894.58          | -0.12           | 3.34            |
|          |                  |                 |                 | 4.02     | -894.61          | -0.16           | 3.30            |

<sup>a</sup>Energy relative to separate slab and CO<sub>2</sub>. <sup>b</sup>Energies relative to physically adsorbed state

**Table S4. Geometry scans for CO<sub>2</sub> on four low-index surfaces of VC. The distance between the surfaces and adsorbate (Cslab) are given in Å; whilst the energies of the total (E<sub>TOT</sub>) and relative values are given in eV.**

| VC{001} |                  |                 |                 | VC{011} |                  |                 |                 |
|---------|------------------|-----------------|-----------------|---------|------------------|-----------------|-----------------|
| Cslab   | E <sub>TOT</sub> | ΔE <sup>a</sup> | ΔE <sup>b</sup> | Cslab   | E <sub>TOT</sub> | ΔE <sup>a</sup> | ΔE <sup>b</sup> |
| 2.90    | -949.52          | -0.32           | 0.00            | 3.10    | -919.06          | -0.22           | 0.00            |
| 2.67    | -949.50          | -0.29           | 0.02            | 2.92    | -919.05          | -0.21           | 0.01            |
| 2.45    | -949.44          | -0.24           | 0.08            | 2.73    | -918.99          | -0.15           | 0.07            |
| 2.22    | -949.40          | -0.20           | 0.12            | 2.54    | -918.85          | -0.01           | 0.21            |
| 2.00    | -949.26          | -0.05           | 0.26            | 2.35    | -918.87          | -0.03           | 0.19            |
| 1.77    | -949.27          | -0.06           | 0.25            | 2.16    | -918.85          | -0.01           | 0.21            |
| 1.55    | -949.47          | -0.26           | 0.06            | 1.97    | -918.87          | -0.02           | 0.19            |
|         |                  |                 |                 | 1.79    | -918.99          | -0.15           | 0.07            |
|         |                  |                 |                 | 1.60    | -919.02          | -0.18           | 0.04            |

<sup>a</sup>Energy relative to separate slab and CO<sub>2</sub>. <sup>b</sup>Energies relative to physically adsorbed state

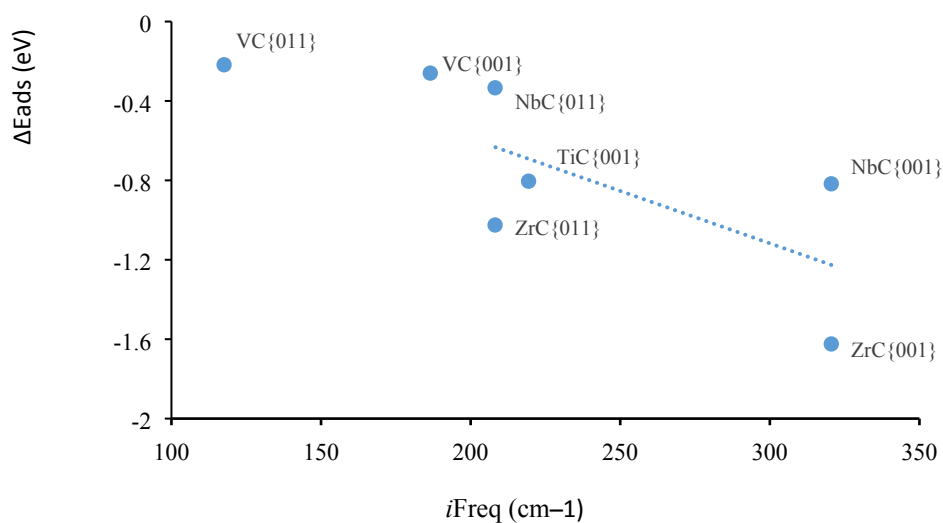

Figure S1. Negative correlation between chemical adsorption energy and the imaginary frequency for the CO<sub>2</sub> reduction transition state.

**Table S5.** Changes in workfunction ( $\phi$ ), absorption energy ( $\Delta E$ ) and the grouped adsorbate Bader charges ( $\beta$ ) for CO<sub>2</sub> adsorption. The physically and chemically adsorbed states are indicated by subscript phys and chem, respectively. All energies are given in eV.

|           | $\Phi_{\text{phys}}$ | $\Phi_{\text{chem}}$ | $\Delta E_{\text{phys}}$ | $\Delta E_{\text{chem}}$ | $\beta_{\text{phys}}$ | $\beta_{\text{chem}}$ |
|-----------|----------------------|----------------------|--------------------------|--------------------------|-----------------------|-----------------------|
| TiC{001}  | 2.81                 | ~                    | -0.08                    | -0.53                    | 0.02                  | ~                     |
| TiC{011}  | ~                    | 2.80                 | ~                        | -3.43                    | ~                     | 0.00                  |
| TiC{111}C | 5.73                 | 5.12                 | ~                        | ~                        | 0.00                  | -0.19                 |
| TiC{111}M | ~                    | 5.14                 | ~                        | -0.98                    | ~                     | 0.08                  |
| VC{001}   | 3.31                 | 3.36                 | -0.17                    | -0.57                    | 0.02                  | 0.03                  |
| VC{011}   | ~                    | 3.42                 | -0.45                    | ~                        | ~                     | 0.67                  |
| VC{111}C  | 4.55                 | ~                    | ~                        | ~                        | 0.00                  | ~                     |
| VC{111}M  | ~                    | 4.85                 | ~                        | -0.96                    | ~                     | 0.16                  |
| ZrC{001}  | 2.87                 | 2.96                 | ~                        | -0.59                    | 0.02                  | 0.00                  |
| ZrC{011}  | ~                    | 4.08                 | ~                        | -0.70                    | ~                     | 0.06                  |
| ZrC{111}C | ~                    | ~                    | -0.43                    | ~                        | ~                     | ~                     |
| ZrC{111}M | ~                    | 4.91                 | ~                        | -1.05                    | ~                     | 0.08                  |
| NbC{001}  | ~                    | 3.13                 | -0.18                    | ~                        | ~                     | 0.07                  |
| NbC{011}  | ~                    | 2.59                 | ~                        | -0.80                    | ~                     | 0.02                  |
| NbC{111}C | 5.00                 | ~                    | -0.31                    | -1.01                    | 0.00                  | ~                     |
| NbC{111}M | ~                    | 5.08                 | ~                        | -0.87                    | ~                     | 0.11                  |

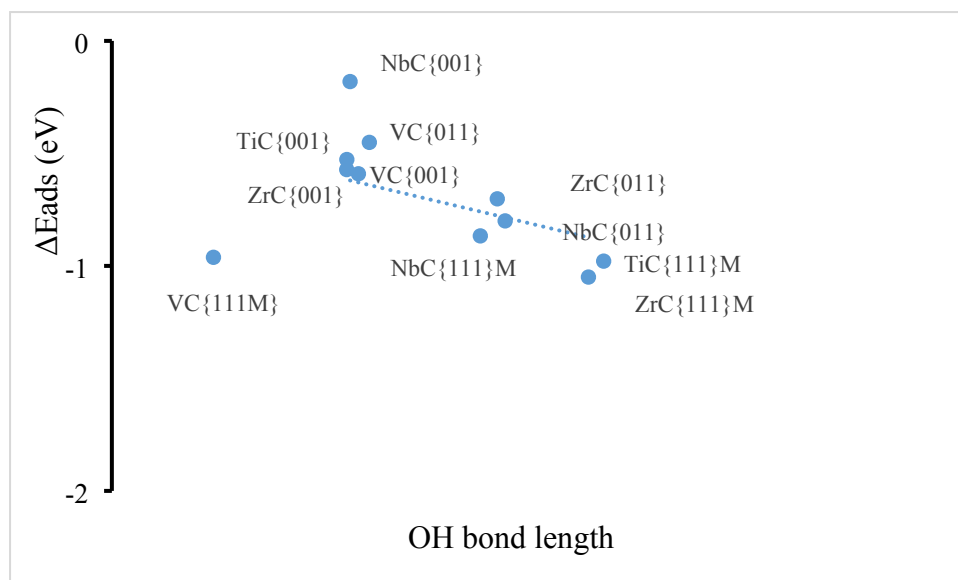

**Figure S2.** Correlation between chemical adsorption energy and the H<sub>2</sub>O bond length of H<sub>2</sub>O reduction transition state.

**Table S6. Geometry scans for H<sub>2</sub>O on the {001} surfaces of TiC and VC, which have been preloaded with CO<sub>2</sub>. The distance between the surfaces and adsorbate (Cslab) are given in Å; whilst the energies of the total (E<sub>TOT</sub>) and relative values are given in eV.**

| TiC{001} |                  |                 |                 | VC{001} |                  |                 |                 |
|----------|------------------|-----------------|-----------------|---------|------------------|-----------------|-----------------|
| Cslab    | E <sub>TOT</sub> | ΔE <sup>a</sup> | ΔE <sup>b</sup> | Cslab   | E <sub>TOT</sub> | ΔE <sup>a</sup> | ΔE <sup>b</sup> |
| 4.68     | -946.31          | -0.01           | -0.32           | 4.86    | -964.07          | -0.37           | -0.33           |
| 4.45     | -946.32          | -0.01           | -0.32           | 4.64    | -964.07          | -0.37           | -0.33           |
| 4.22     | -946.32          | -0.02           | -0.33           | 4.41    | -964.08          | -0.38           | -0.34           |
| 3.98     | -946.33          | -0.03           | -0.34           | 4.19    | -964.08          | -0.38           | -0.34           |
| 3.75     | -946.35          | -0.04           | -0.36           | 3.96    | -964.09          | -0.39           | -0.35           |
| 3.52     | -946.37          | -0.06           | -0.37           | 3.74    | -964.10          | -0.40           | -0.36           |
| 3.29     | -946.38          | -0.08           | -0.39           | 3.51    | -964.11          | -0.41           | -0.37           |
| 3.06     | -946.38          | -0.07           | -0.38           | 3.29    | -964.12          | -0.42           | -0.38           |
| 2.83     | -946.32          | -0.02           | -0.33           | 3.06    | -964.14          | -0.44           | -0.40           |
| 2.60     | -946.18          | 0.12            | -0.19           | 2.84    | -964.14          | -0.44           | -0.40           |
| 2.37     | -945.91          | 0.39            | 0.08            | 2.61    | -964.11          | -0.41           | -0.37           |
| 2.14     | -946.46          | -0.15           | -0.46           | 2.39    | -964.03          | -0.33           | -0.28           |
|          |                  |                 |                 | 2.16    | -963.87          | -0.17           | -0.13           |
|          |                  |                 |                 | 1.94    | -963.66          | 0.04            | 0.09            |
|          |                  |                 |                 | 1.71    | -964.67          | -0.97           | -0.93           |

<sup>a</sup>Energy relative to separate slab and CO<sub>2</sub>. <sup>b</sup>Energies relative to physically adsorbed state

**Table S7. Geometry scans for H<sub>2</sub>O on the {001} surfaces of NbC and ZrC, which have been preloaded with CO<sub>2</sub>. The distance between the surfaces and adsorbate (Cslab) are given in Å; whilst the energies of the total (E<sub>TOT</sub>) and relative values are given in eV.**

| NbC{001} |                  |                 |                 | ZrC{001} |                  |                 |                 |
|----------|------------------|-----------------|-----------------|----------|------------------|-----------------|-----------------|
| Cslab    | E <sub>TOT</sub> | ΔE <sup>a</sup> | ΔE <sup>b</sup> | Cslab    | E <sub>TOT</sub> | ΔE <sup>a</sup> | ΔE <sup>b</sup> |
| 4.52     | -1033.65         | 0.00            | -0.35           | 4.31     | -975.63          | 0.00            | -0.32           |
| 4.29     | -1033.66         | -0.01           | -0.35           | 4.07     | -975.63          | 0.00            | -0.32           |
| 4.05     | -1033.66         | -0.01           | -0.35           | 3.83     | -975.64          | -0.01           | -0.33           |
| 3.82     | -1033.67         | -0.02           | -0.36           | 3.59     | -975.65          | -0.02           | -0.35           |
| 3.58     | -1033.68         | -0.03           | -0.37           | 3.34     | -975.68          | -0.05           | -0.38           |
| 3.35     | -1033.68         | -0.03           | -0.38           | 3.10     | -975.71          | -0.08           | -0.41           |
| 3.11     | -1033.67         | -0.02           | -0.37           | 2.86     | -975.72          | -0.09           | -0.42           |
| 2.88     | -1033.63         | 0.02            | -0.32           | 2.62     | -975.69          | -0.06           | -0.39           |
| 2.65     | -1033.63         | 0.02            | -0.32           | 2.37     | -975.59          | 0.04            | -0.29           |
| 2.41     | -1033.51         | 0.14            | -0.20           | 2.13     | -975.39          | 0.24            | -0.09           |
| 2.18     | -1033.27         | 0.38            | 0.03            | 1.89     | -975.94          | -0.31           | -0.64           |
| 1.94     | -1034.14         | -0.49           | -0.83           |          |                  |                 |                 |

<sup>a</sup>Energy relative to separate slab and CO<sub>2</sub>. <sup>b</sup>Energies relative to physically adsorbed state
